# Supplementary material
Source: PubMed Central journal article supplement (PMC3397271)
Supplement: mmc1.pdf [file mmc1.pdf]

## Supplemental Data

# Genome-wide Transcriptome Profiling Reveals the Functional Impact of Rare De Novo and Recurrent CNVs in Autism Spectrum Disorders

Rui Luo, Stephan J. Sanders, Yuan Tian, Irina Voineagu, Ni Huang, Su H. Chu, Lambertus Klei, Chaochao Cai, Jing Ou, Jennifer K. Lowe, Matthew E. Hurles, Bernie Devlin, Matthew W. State, and Daniel H. Geschwind

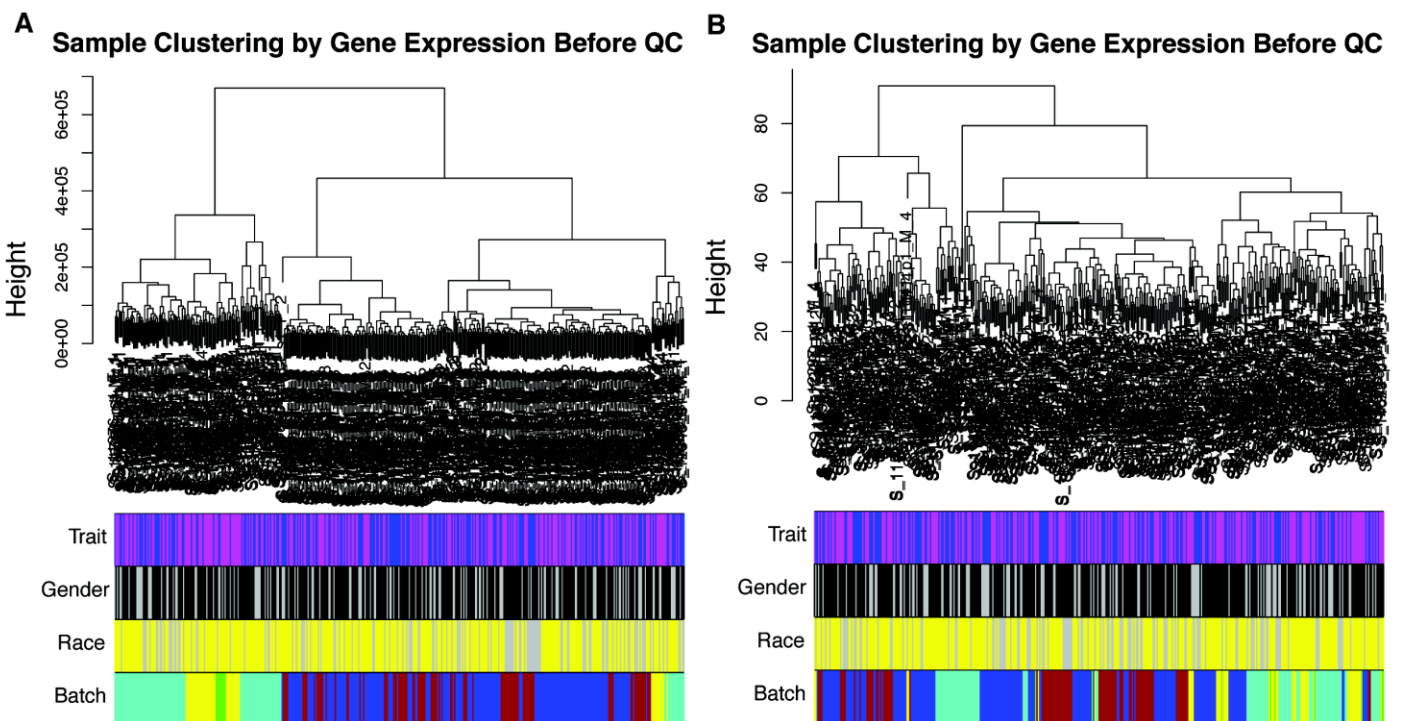

**Figure S1. Data Preprocessing to Remove Outlier Chips and Correct for Batch Effects**

(A) Hierarchical clustering of samples before data quality control (QC). Color bars show the trait (case: magenta; control: cyan), gender (male: black; female: grey), race (Caucasian: yellow; non-Caucasian: grey) and batch of each sample. Batch is defined based on the hybridization date.

(B) Hierarchical clustering after quality control including removing outlier chips, quantile normalization and combat for removing batch effects.

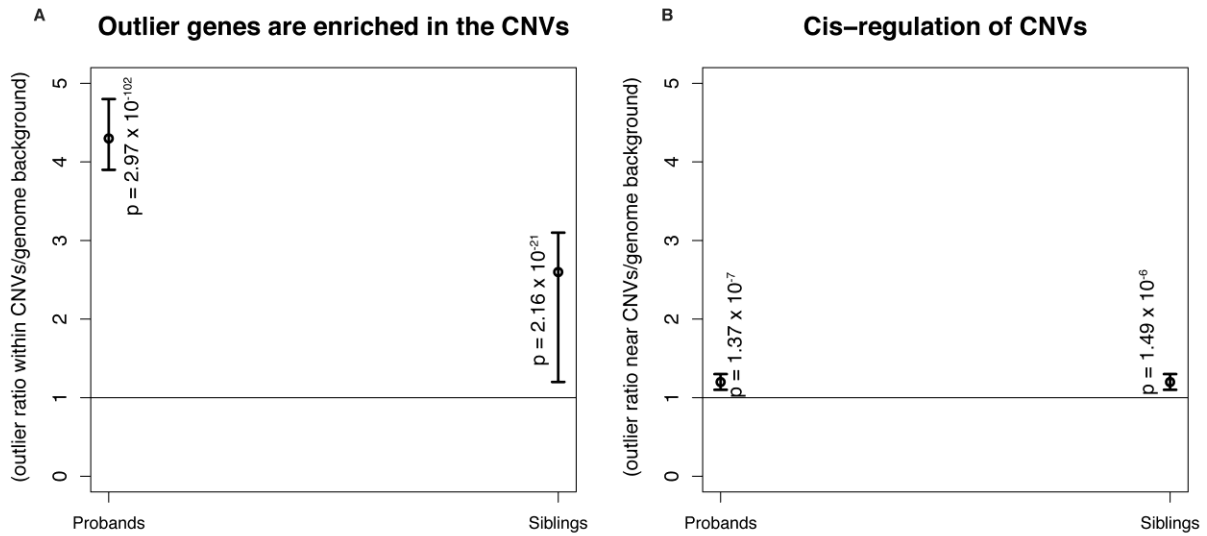

**Figure S2. CNVs Affect the Expression of Genes within CNVs and up to 500 kb Surrounding Them**

(A) Odds ratio (OR) of the percentage of dysregulated genes (2SD) within CNVs compared to the percentage of dysregulated genes out of 9,524 genes (11,150 expressed probes) across the genome (background). Bar height shows the 95% confidence interval (CI). The CNVs comprise all CNVs each individual has, including both rare and common CNVs.

(B) Odds ratio of the percentage of dysregulated genes in the 500 kb surrounding region of probands and siblings compared to the ratio of dysregulated genes in the genome background. The OR is significant for both probands and siblings for genes within CNVs, as well as genes within 500 kb nearby (p value by Fisher's exact test).

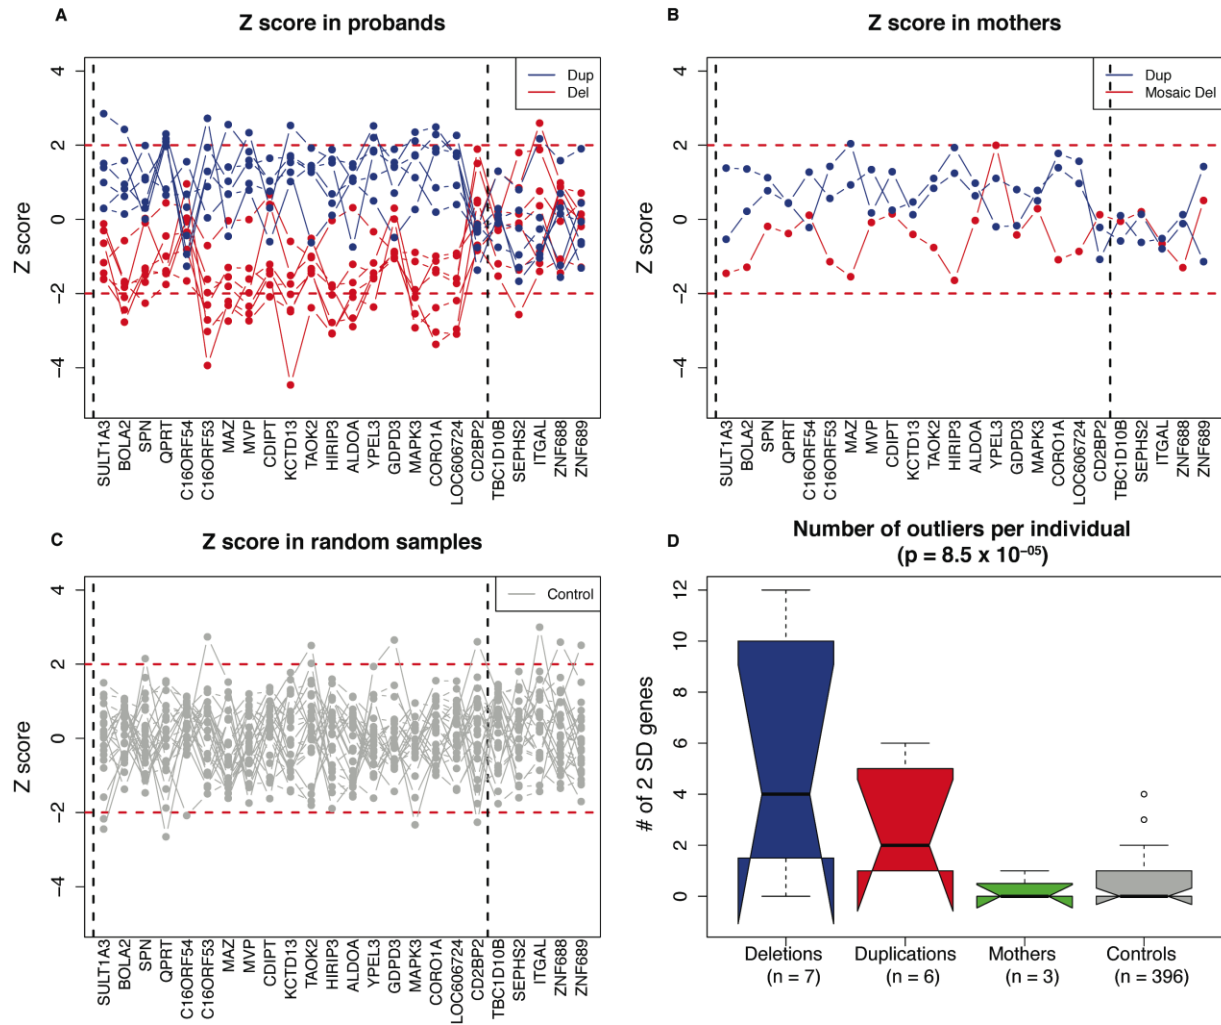

**Figure S3. Dysregulation of Genes within 16p11.2 and the Closely Surrounding Region in Proband, Carriers, and Controls**

(A) Z scores of 18 expressed genes within 16p11.2 and 6 expressed genes residing 500 kb upstream or downstream in probands (7 deletions: red; and 6 duplications: blue). Genes on x-axis are aligned based on their location on chromosome. The 16p11.2 boundaries are shown with vertical dashed lines. 2 SD is used as the cutoff to define outlier genes (horizontal dashed lines).

(B) Z scores of the same 24 genes in 3 mothers who carry the 16p11.2 events, but are unaffected (2 duplications: blue; and 1 mosaic deletion: red).

(C) Z scores of the same 24 genes in 20 randomly picked individuals (either probands or siblings) without known 16p11.2 events.

(D) The boxplot shows the number of outlier genes within 16p11.2 region per individual in different sample groups ( $p$  value =  $8.5 \times 10^{-5}$ , Kruskal-Wallis test).

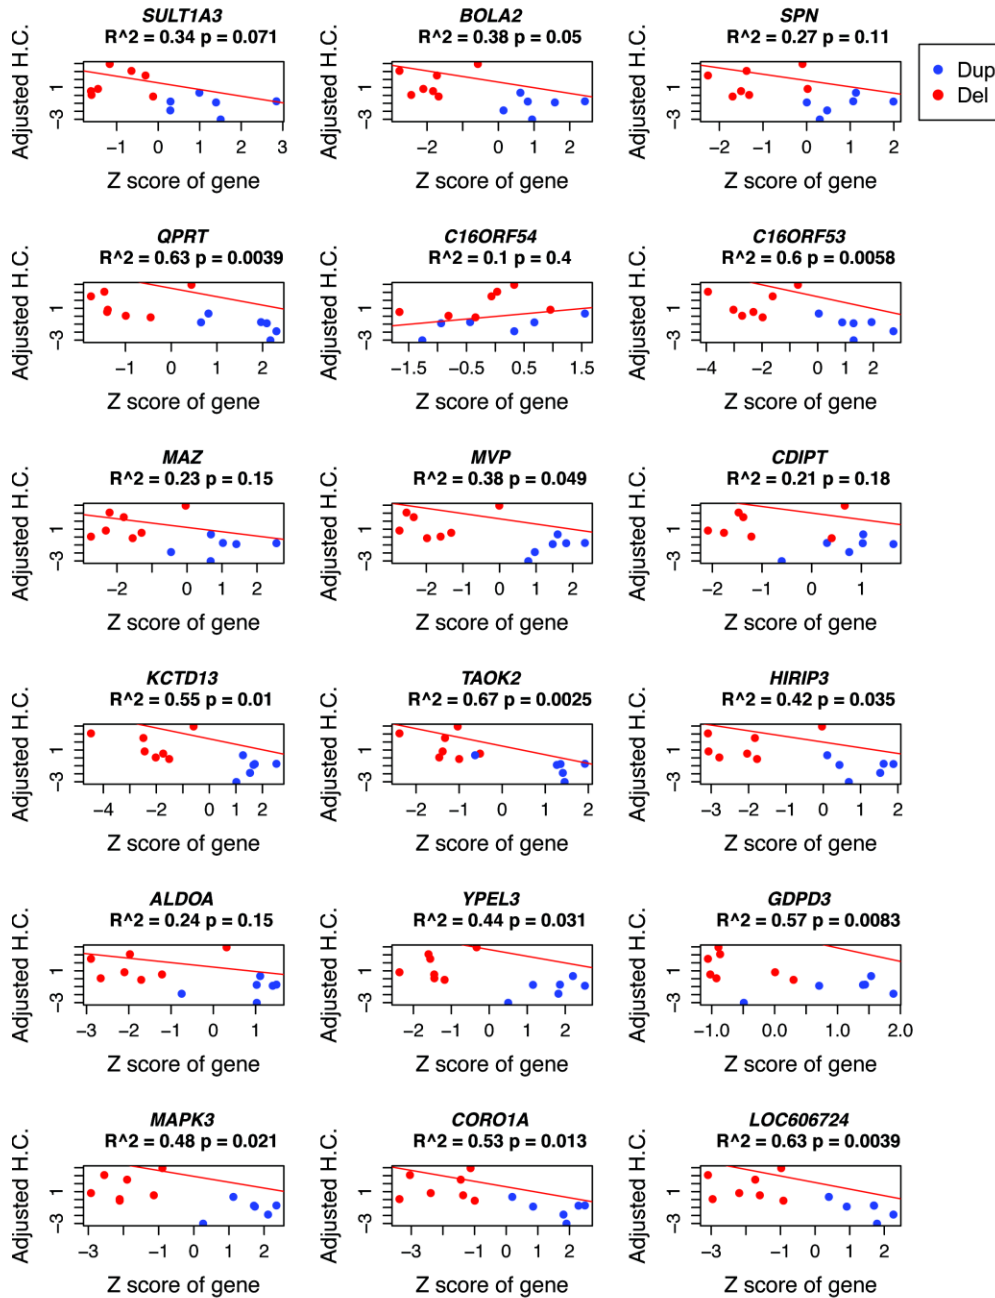

**Figure S4. Correlation of Head Circumference and Gene Expression within 16p11.2**

The Z scores of 18 expressed genes within 16p11.2 region (x axis) and adjusted head circumference (HC; y axis) are shown. A multivariate linear regression model is fitted (variables used are standardized expression value (Z score), age and gender; Material and Methods). R-square of the linear regression model and p-value of the correlation between standardized expression value and HC is shown.

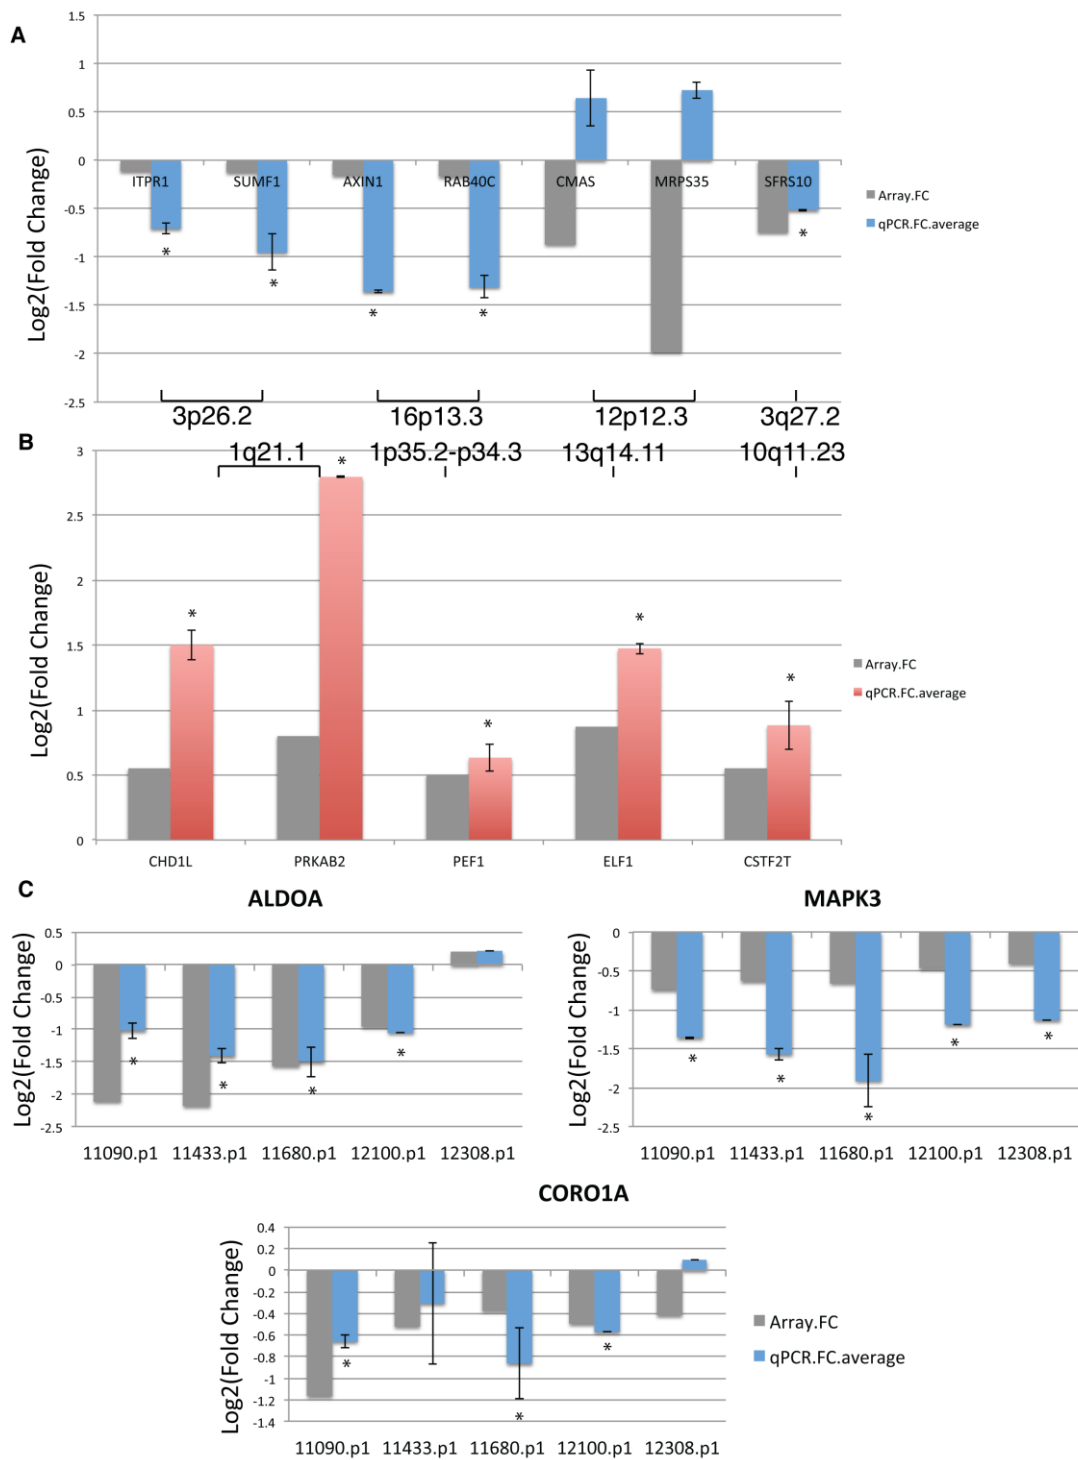

**Figure S5. Confirmation of the Outlier Genes by qRT-PCR**

(A) Eight down-regulated genes in 4 probands tested by qRT-PCR (Material and Methods). Seventy-five percent of them are validated, showing at least 1.3-fold change (\*). The CNV harboring each gene is shown.

(B) Five up-regulated genes in 4 probands are validated by qRT-PCR. One hundred percent of them are validated (\* highlights genes with at least 1.3-fold change by qRT-PCR).

(C) Three genes down-regulated in 16p11.2 deletions are validated in 5 probands. Results represent the log<sub>2</sub> fold change of each gene on microarray and qRT-PCR (1.3-fold change: \*).

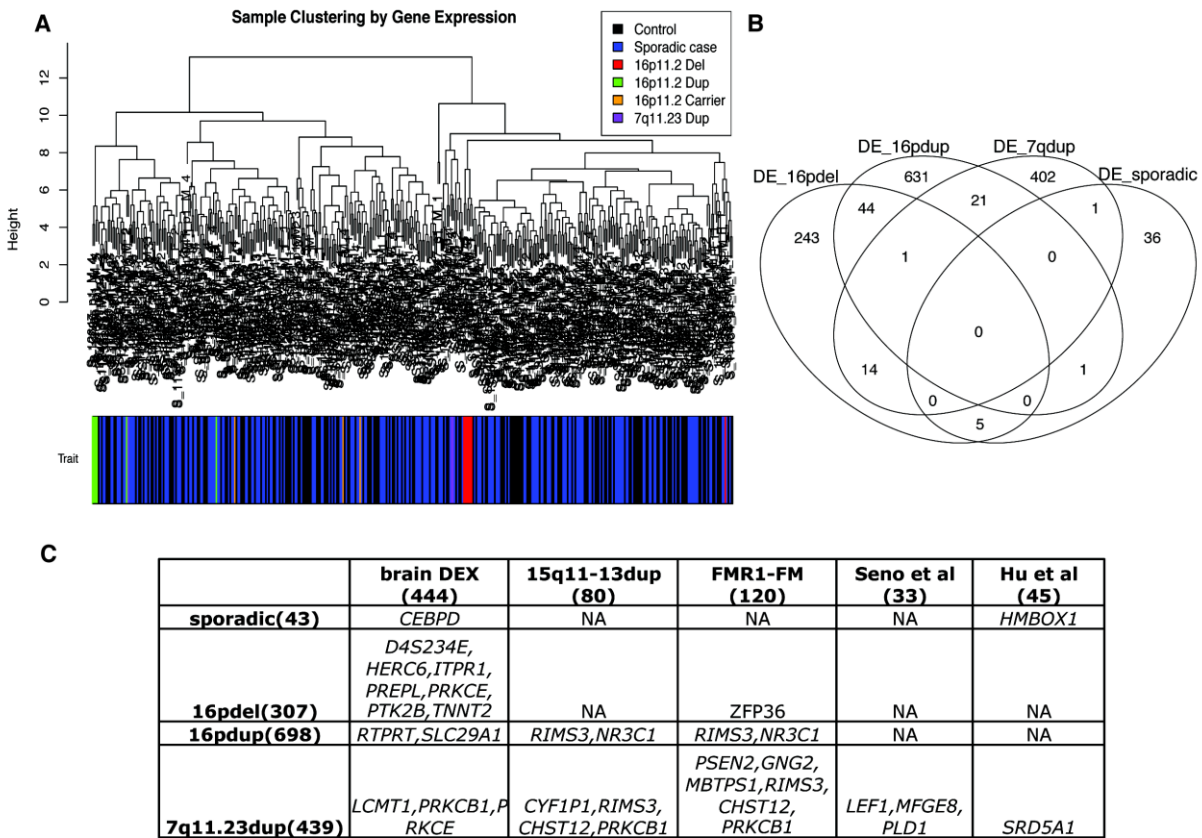

**Figure S6. Differential Expression Analysis in the Simons Simplex Collection (SSC)**

(A) Sample clustering analysis for all sporadic cases (blue), controls (black), 16p11.2 deletions (red), 16p11.2 duplications (blue), 16p11.2 carriers (orange) and 7q11.23 duplications.

(B) Venn diagram of the overlap of DEX genes ( $p < 0.05$ ) identified in different groups (DEX, differentially expressed genes).

(C) DEX overlap with autism brain<sup>1</sup>, recurrent events: 15q11-13dup, FMR1-FM<sup>2</sup> and LCLs<sup>3;4</sup>.

**Table S1. Sample Inclusion Information**

|          |          |          |          |          |          |          |          |          |           |           |
|----------|----------|----------|----------|----------|----------|----------|----------|----------|-----------|-----------|
| 11345.s1 | 11868.p1 | 11511.p1 | 11393.p1 | 13128.p1 | 11066.p1 | 11540.p1 | 11030.s1 | 12261.p1 | 11428.p1  | 11337.s1* |
| 11046.p1 | 11868.s1 | 11511.s1 | 11393.s1 | 12958.p1 | 11066.s1 | 11540.s1 | 11510.p1 | 12261.s1 | 11428.s1  | 11244.p1* |
| 11046.s1 | 11300.p1 | 11425.p1 | 12295.s1 | 13195.p1 | 11276.s1 | 11274.p1 | 11510.s1 | 11220.p1 | 11004.p1  | 11244.s1* |
| 11581.p1 | 11300.s1 | 11425.s1 | 12420.p1 | 12044.s1 | 11276.p1 | 11274.s1 | 11587.p1 | 11220.s1 | 11004.s1  | 11102.p1* |
| 11581.s1 | 11014.p1 | 11329.p1 | 12420.s1 | 12435.p1 | 11156.p1 | 11098.p1 | 11587.s1 | 11316.p1 | 11551.p1  | 11102.s1* |
| 11479.p1 | 11014.s1 | 11329.s1 | 12523.p1 | 12581.p1 | 11156.s1 | 11098.s1 | 11063.p1 | 11316.s1 | 11551.s1  | 11443.p1* |
| 11479.s1 | 11473.p1 | 11519.p1 | 12523.s1 | 11121.p1 | 12073.p1 | 11000.p1 | 11063.s1 | 11029.p1 | 11085.s1  | 11443.s1* |
| 11364.p1 | 11473.s1 | 11519.s1 | 11334.p1 | 11121.s1 | 12073.s1 | 11000.s1 | 11424.p1 | 11029.s1 | 11285.p1  | 11461.p1* |
| 11364.s1 | 11348.p1 | 11080.p1 | 11135.p1 | 11557.s1 | 12032.p1 | 11839.p1 | 11424.s1 | 11413.p1 | 11285.s1  | 11461.s1* |
| 11962.p1 | 11348.s1 | 11059.p1 | 11356.p1 | 11429.p1 | 12451.p1 | 11839.s1 | 11578.p1 | 11413.s1 | 11089.p1  | 11533.p1* |
| 11962.s1 | 11275.p1 | 11059.s1 | 11356.s1 | 11429.s1 | 12351.s1 | 11247.p1 | 11578.s1 | 11254.p1 | 11089.s1  | 11533.s1* |
| 11390.p1 | 11275.s1 | 11879.p1 | 11411.p1 | 11291.p1 | 11524.p1 | 11247.s1 | 11333.p1 | 11254.s1 | 11696.p1  | 11426.p1* |
| 11475.p1 | 11523.p1 | 11879.s1 | 11411.s1 | 11291.s1 | 11524.s1 | 11091.p1 | 11333.s1 | 11577.p1 | 11216.p1  | 11426.s1* |
| 11475.s1 | 11523.s1 | 11723.p1 | 11267.p1 | 11376.p1 | 11489.p1 | 11091.s1 | 11490.p1 | 11577.s1 | 11216.s1  | 11457.p1* |
| 11353.p1 | 11189.p1 | 11723.s1 | 11267.s1 | 11376.s1 | 11489.s1 | 11208.p1 | 11490.s1 | 11303.p1 | 11387.p1  | 11457.s1* |
| 11353.s1 | 11189.s1 | 11629.mo | 11028.p1 | 11550.s1 | 11458.s1 | 11208.s1 | 11327.p1 | 11303.s1 | 12297.p1  | 11579.p1* |
| 11520.p1 | 11537.p1 | 11629.p1 | 11028.s1 | 11417.p1 | 11458.s1 | 11731.p1 | 11327.s1 | 11083.p1 | 12297.s1  | 11579.s1* |
| 11520.s1 | 11537.s1 | 11168.p1 | 11546.p1 | 11417.s1 | 11610.p1 | 11731.s1 | 11406.p1 | 11083.s1 | 11480.p1  | 11442.p1* |
| 11484.p1 | 11178.p1 | 11168.s1 | 11546.s1 | 11328.p1 | 11610.s1 | 12184.p1 | 11406.s1 | 11152.p1 | 11480.s1  | 11442.s1* |
| 11484.s1 | 11178.s1 | 11071.p1 | 11410.p1 | 11328.s1 | 11345.p1 | 12184.s1 | 11412.p1 | 11152.s1 | 11718.p1  | 11418.p1* |
| 11193.p1 | 11445.p1 | 11071.s1 | 11410.s1 | 11634.p1 | 11948.p1 | 12308.p1 | 11412.s1 | 11242.p1 | 11718.s1  | 11418.s1* |
| 11193.s1 | 11445.s1 | 11113.p1 | 11415.p1 | 11634.s1 | 11948.s1 | 12417.mo | 11435.p1 | 11242.s1 | 11090.p1  | 11076.p1* |
| 11857.p1 | 11469.p1 | 11113.s1 | 11415.s1 | 11765.p1 | 11990.p1 | 12417.p1 | 11057.p1 | 11197.p1 | 12044.p1  | 11076.s1* |
| 11857.s1 | 11469.s1 | 11554.p1 | 11809.p1 | 11765.s1 | 11990.s1 | 11006.p1 | 11057.s1 | 11197.s1 | 11342.p1* | 11293.p1* |
| 11399.p1 | 11450.p1 | 11554.s1 | 11998.p1 | 11680.p1 | 11979.p1 | 11006.s1 | 11452.p1 | 11129.p1 | 11342.s1* | 11293.s1* |
| 11399.s1 | 11450.s1 | 11379.p1 | 11998.s1 | 12346.s1 | 11979.s1 | 11509.p1 | 11452.s1 | 11284.p1 | 11186.p1* | 11062.p1* |
| 12096.p1 | 11466.p1 | 11379.s1 | 12083.p1 | 12647.p1 | 12014.p1 | 11509.s1 | 11301.p1 | 11284.s1 | 11186.s1* | 11062.s1* |
| 12096.s1 | 11466.s1 | 11383.p1 | 12083.s1 | 12399.p1 | 12014.s1 | 11207.p1 | 11301.s1 | 11325.p1 | 11338.p1* | 11007.p1* |
| 11824.s1 | 11420.p1 | 11383.s1 | 12279.p1 | 12399.s1 | 12048.p1 | 11207.s1 | 11555.mo | 11325.s1 | 11338.s1* | 11007.s1* |
| 11459.p1 | 11420.s1 | 11219.p1 | 12279.s1 | 11501.s1 | 12048.s1 | 11474.p1 | 11555.p1 | 11689.p1 | 11271.p1* | 11335.p1* |
| 11459.s1 | 11455.p1 | 11219.s1 | 12117.s1 | 11501.p1 | 12100.p1 | 11474.s1 | 11555.s1 | 11625.p1 | 11271.s1* | 11335.s1* |
| 11502.p1 | 11455.s1 | 11201.s1 | 12219.p1 | 11146.p1 | 12299.s1 | 11114.p1 | 11154.p1 | 11625.s1 | 11260.p1* | 11191.p1* |
| 11502.s1 | 11053.p1 | 11075.p1 | 12235.p1 | 11146.s1 | 12457.s1 | 11114.s1 | 11154.s1 | 12015.p1 | 11260.s1* | 11191.s1* |
| 11947.p1 | 11053.s1 | 11075.s1 | 12239.p1 | 11532.p1 | 11378.p1 | 11073.p1 | 11736.p1 | 12015.s1 | 11138.p1* | 11482.p1* |
| 11947.s1 | 11180.p1 | 11323.p1 | 12241.p1 | 11495.s1 | 11378.s1 | 11073.s1 | 11736.s1 | 12339.p1 | 11138.s1* | 11482.s1* |
| 12385.p1 | 11180.s1 | 11323.s1 | 12241.s1 | 11495.p1 | 11032.p1 | 11233.p1 | 11831.p1 | 12327.p1 | 11149.p1* | 11005.p1* |
| 12385.s1 | 11499.p1 | 11177.p1 | 12224.p1 | 11407.p1 | 11032.s1 | 11233.s1 | 11831.s1 | 12327.s1 | 11149.s1* | 11005.s1* |
| 12383.p1 | 11499.s1 | 11177.s1 | 12685.p1 | 11407.s1 | 11041.p1 | 11382.p1 | 12078.p1 | 12603.p1 | 11192.p1* | 11427.p1* |
| 12343.p1 | 11572.p1 | 11433.p1 | 12512.p1 | 11265.s1 | 11563.p1 | 11382.s1 | 12078.s1 | 12603.s1 | 11192.s1* | 11427.s1* |
| 12594.p1 | 11572.s1 | 11343.p1 | 12984.p1 | 11265.p1 | 11563.s1 | 11030.p1 | 12007.p1 | 12736.p1 | 11337.p1* | 11337.s1* |

\* Samples can be included, while these families did not meet SSC Inclusion Criteria.

**Table S2. GO Enrichment of Outlier Genes in Proband and Siblings****DAVID GO Enrichment of Outlier Genes in Proband**

| Term <sup>a</sup>                                            | p Value <sup>b</sup> |
|--------------------------------------------------------------|----------------------|
| protein modification by small protein conjugation or removal | 0.00191              |
| cytosol                                                      | 0.00219              |
| cartilage development                                        | 0.00241              |
| protein folding                                              | 0.00283              |
| ubiquitin ligase complex                                     | 0.00491              |
| regulation of synaptic transmission                          | 0.00498              |
| regulation of transmission of nerve impulse                  | 0.00498              |
| regulation of neurological system process                    | 0.00510              |
| endochondral bone morphogenesis                              | 0.00530              |
| regulation of cellular amine metabolic process               | 0.00639              |
| protein modification by small protein conjugation            | 0.00733              |
| endoplasmic reticulum                                        | 0.00892              |
| soluble fraction                                             | 0.00925              |
| cell-cell adherens junction                                  | 0.00937              |
| ligase activity, forming carbon-nitrogen bonds               | 0.00995              |
| bone morphogenesis                                           | 0.01123              |
| cell-cell junction                                           | 0.01237              |
| spliceosomal snRNP biogenesis                                | 0.01262              |
| acid-amino acid ligase activity                              | 0.01457              |
| actin polymerization or depolymerization                     | 0.01573              |

**DAVID GO Enrichment of Outlier Genes in Siblings**

| Term                                                           | p Value               |
|----------------------------------------------------------------|-----------------------|
| anatomical structure homeostasis                               | $5.24 \times 10^{-5}$ |
| hydrogen peroxide metabolic process                            | 0.00489               |
| tissue homeostasis                                             | 0.00663               |
| response to inorganic substance                                | 0.00663               |
| protein amino acid dephosphorylation                           | 0.01210               |
| dephosphorylation                                              | 0.01410               |
| phosphatase activity                                           | 0.01438               |
| protein amino acid deacetylation                               | 0.01515               |
| Wnt receptor signaling pathway                                 | 0.01573               |
| phosphoprotein phosphatase activity                            | 0.01650               |
| response to UV                                                 | 0.01653               |
| multicellular organismal homeostasis                           | 0.01653               |
| response to hydrogen peroxide                                  | 0.01764               |
| protein tyrosine phosphatase activity                          | 0.01796               |
| cellular response to oxidative stress                          | 0.01815               |
| proton-transporting ATP synthase complex, coupling factor F(o) | 0.01909               |
| ATP biosynthetic process                                       | 0.02031               |
| proton-transporting ATP synthase complex                       | 0.02170               |
| purine nucleoside triphosphate biosynthetic process            | 0.02183               |
| histone methylation                                            | 0.02390               |

<sup>a</sup> Top 15 terms with p value smaller than 0.05 are listed.

<sup>b</sup> Uncorrected p value reported by DAVID GO.



**Table S3. Known Autism Candidate Genes as Outlier Genes in Probands**

| Gene <sup>a</sup> | # of Proband (Up/Down) <sup>b</sup> | # of Sibling (Up/Down) <sup>b</sup> | Description                                                                                             | Location      |
|-------------------|-------------------------------------|-------------------------------------|---------------------------------------------------------------------------------------------------------|---------------|
| <i>PPP1R3F</i>    | 3/1                                 | 0/0                                 | protein phosphatase 1, regulatory (inhibitor) subunit 3F                                                | Xp11.23       |
| <i>ADA</i>        | 2/0                                 | 0/0                                 | adenosine deaminase                                                                                     | 20q12-q13.11  |
| <i>GLO1</i>       | 2/0                                 | 0/0                                 | glyoxalase I                                                                                            | 6p21.3-p21.1  |
| <i>AUTS2</i>      | 1/0                                 | 0/0                                 | autism susceptibility candidate 2                                                                       | 7q11.22       |
| <i>CYFIP1</i>     | 1/1                                 | 0/0                                 | cytoplasmic FMR1 interacting protein 1                                                                  | 15q11.2       |
| <i>HRAS</i>       | 1/0                                 | 0/0                                 | v-Ha-ras Harvey rat sarcoma viral oncogene homolog                                                      | 11p15.5       |
| <i>SLC1A1</i>     | 1/0                                 | 0/0                                 | solute carrier family 1 (neuronal/epithelial high affinity glutamate transporter, system Xag), member 1 | 9p24          |
| <i>UBE2H</i>      | 1/0                                 | 0/0                                 | ubiquitin-conjugating enzyme E2H (UBC8 homolog, yeast)                                                  | 7q32          |
| <i>CASC4</i>      | 0/1                                 | 0/0                                 | cancer susceptibility candidate 4                                                                       | 15q15.3       |
| <i>CNTN4</i>      | 0/2                                 | 0/0                                 | contactin 4                                                                                             | 3p26-p25      |
| <i>DPP6</i>       | 0/2                                 | 0/0                                 | dipeptidyl-peptidase 6                                                                                  | 7q36.2        |
| <i>EGR2</i>       | 0/1                                 | 0/0                                 | early growth response 2 (Krox-20 homolog, Drosophila)                                                   | 10q21.1       |
| <i>GPC6</i>       | 0/1                                 | 0/0                                 | glypican 6                                                                                              | 13q32         |
| <i>JMJD1C</i>     | 0/1                                 | 0/0                                 | jumonji domain containing 1C                                                                            | 10q21.2       |
| <i>MEF2C</i>      | 0/1                                 | 0/0                                 | myocyte enhancer factor 2C                                                                              | 5q14          |
| <i>OXTR</i>       | 0/1                                 | 0/0                                 | oxytocin receptor                                                                                       | 3p25          |
| <i>PCDH9</i>      | 0/2                                 | 0/0                                 | protocadherin 9                                                                                         | 13q14.3-q21.1 |
| <i>RAI1</i>       | 0/1                                 | 0/0                                 | retinoic acid induced 1                                                                                 | 17p11.2       |
| <i>RB1CC1</i>     | 0/1                                 | 0/0                                 | RB1-inducible coiled-coil 1                                                                             | 8q11          |
| <i>RIMS3</i>      | 0/2                                 | 0/0                                 | regulating synaptic membrane exocytosis 3                                                               | 1pter-p22.2   |
| <i>SH3KBP1</i>    | 0/1                                 | 0/0                                 | SH3-domain kinase binding protein 1                                                                     | Xp22.1-p21.3  |
| <i>SLC9A9</i>     | 0/1                                 | 0/0                                 | solute carrier family 9 (sodium/hydrogen exchanger), member 9                                           | 3q24          |
| <i>ST7</i>        | 0/2                                 | 0/0                                 | suppression of tumorigenicity 7                                                                         | 7q31.1-q31.3  |
| <i>UBE3A</i>      | 1/0                                 | 0/0                                 | ubiquitin protein ligase E3A (human papilloma virus E6-associated protein, Angel man syndrome)          | 15q11-q13     |

<sup>a</sup> Autism candidate gene list is downloaded from SFARI gene database: <https://gene.sfari.org/>.

<sup>b</sup> This column reports the number of probands and siblings who have the gene to be dysregulated (3 SD).

**Table S4. Individuals with Outlier Genes (3 SD)**

| Probe_Id     | Symbol        | IDs with this Gene 3 SD Downregulated | IDs with this Gene 3 SD Upregulated                   |
|--------------|---------------|---------------------------------------|-------------------------------------------------------|
| ILMN_1806408 | ACADVL        | 11334.p1,11177.p1                     | 0                                                     |
| ILMN_2038777 | ACTB          | 11809.p1,12014.p1                     | 0                                                     |
| ILMN_2053178 | ACTG1         | 11809.p1,11267.p1                     | 11382.s1                                              |
| ILMN_1803686 | ADA           | 11689.p1,11450.p1                     | 0                                                     |
| ILMN_1814526 | ADD3          | 11334.p1,12603.p1                     | 11192.p1                                              |
| ILMN_2342841 | AFTIPHILIN    | 11348.p1,11337.p1                     | 0                                                     |
| ILMN_1740752 | AGPAT6        | 11207.p1,11523.p1                     | 0                                                     |
| ILMN_1741148 | ALDOA         | 11090.p1,11433.p1                     | 0                                                     |
| ILMN_1712298 | ANKRD46       | 11135.p1,11947.p1                     | 11333.s1,11329.p1                                     |
| ILMN_2402798 | AP2M1         | 11475.p1,11192.p1                     | 0                                                     |
| ILMN_1722491 | APRT          | 11857.p1,11192.p1                     | 11390.p1                                              |
| ILMN_1726410 | APRT          | 11857.p1,11192.p1                     | 0                                                     |
| ILMN_1718610 | ARHGAP17      | 11177.p1,11523.p1                     | 0                                                     |
| ILMN_1811592 | ARHGAP21      | 12512.p1,11610.p1,11406.p1            | 0                                                     |
| ILMN_1787879 | ARL2          | 11625.p1,11519.p1                     | 0                                                     |
| ILMN_1669113 | ATF5          | 11041.p1,11540.p1                     | 0                                                     |
| ILMN_2415189 | ATP1A1        | 11177.p1,11482.p1                     | 0                                                     |
| ILMN_1766185 | AXIN1         | 11435.p1,11073.p1                     | 0                                                     |
| ILMN_2342271 | BCL11A        | 11041.p1,11879.p1                     | 11519.s1,11625.p1,11519.p1,11480.s1,11177.s1,11947.p1 |
| ILMN_1773780 | C16ORF24      | 11435.p1,11475.p1                     | 0                                                     |
| ILMN_2194828 | C16ORF53      | 12451.p1,11540.p1                     | 0                                                     |
| ILMN_1812441 | C17ORF63      | 12032.p1,11114.p1                     | 0                                                     |
| ILMN_1698233 | C21ORF6       | 11046.p1,11461.p1                     | 11276.p1,11146.s1                                     |
| ILMN_1777318 | C9ORF64       | 11180.p1,11348.p1                     | 12014.p1,12523.p1                                     |
| ILMN_1774196 | C9ORF74       | 11219.p1,11425.p1,11192.p1            | 0                                                     |
| ILMN_1672807 | CA5B          | 12014.p1,11415.p1                     | 0                                                     |
| ILMN_1755504 | CALCOCO2      | 11219.p1,11469.p1                     | 0                                                     |
| ILMN_2388155 | CASP3         | 11041.p1,11424.p1                     | 0                                                     |
| ILMN_1715569 | CCDC53        | 11532.p1,11007.p1,11046.p1            | 11947.s1                                              |
| ILMN_1736567 | CD74          | 12014.p1,12523.p1                     | 0                                                     |
| ILMN_2379644 | CD74          | 11274.p1,11424.p1                     | 11276.s1                                              |
| ILMN_2230683 | CDCA7L        | 11041.p1,11083.p1                     | 0                                                     |
| ILMN_1741459 | CDK10         | 11333.p1,12241.p1                     | 12299.s1                                              |
| ILMN_1802615 | CDK6          | 12512.p1,11337.p1                     | 11177.p1                                              |
| ILMN_1779401 | CHP           | 11475.p1,11537.p1                     | 0                                                     |
| ILMN_1705442 | CMTM3         | 11274.p1,11587.p1                     | 0                                                     |
| ILMN_1742432 | COBRA1        | 12339.p1,11149.p1                     | 0                                                     |
| ILMN_1730084 | COMT          | 12239.p1,11879.p1                     | 11947.s1,11177.p1                                     |
| ILMN_1656920 | CRIP1         | 11435.p1,11007.p1                     | 11587.p1                                              |
| ILMN_1690122 | CRKL          | 12239.p1,11177.p1                     | 11029.s1                                              |
| ILMN_1812353 | CSPP1         | 11461.p1,11490.p1                     | 11537.s1                                              |
| ILMN_1739576 | CYB5R2        | 11220.p1,11537.p1                     | 0                                                     |
| ILMN_1661599 | DDIT4         | 11135.p1,11177.p1                     | 0                                                     |
| ILMN_2145423 | DET1          | 12523.p1,11475.p1                     | 11495.p1                                              |
| ILMN_1738124 | DKFZP686I1569 | 11511.p1,11425.p1,11947.p1            | 0                                                     |
| ILMN_2380967 | DNASE1L1      | 11868.p1,11879.p1                     | 11178.s1                                              |
| ILMN_1726990 | DOM3Z         | 12327.p1,11461.p1                     | 11482.s1                                              |
| ILMN_2304624 | EIF4H         | 11177.p1,11275.p1                     | 11129.p1                                              |
| ILMN_1710756 | ENO1          | 11135.p1,11219.p1                     | 0                                                     |
| ILMN_1663379 | FBXL15        | 12327.p1,11410.p1,11461.p1            | 0                                                     |
| ILMN_1754489 | FBXL20        | 12235.p1,11177.p1                     | 11482.s1,11029.s1                                     |
| ILMN_1737005 | FLJ12886      | 11177.p1,11466.p1                     | 0                                                     |
| ILMN_1708900 | FLJ20422      | 11083.p1,11168.p1                     | 0                                                     |
| ILMN_1730631 | FLJ21945      | 11625.p1,11519.p1,11947.p1            | 0                                                     |
| ILMN_2344455 | G3BP1         | 12297.p1,11348.p1                     | 0                                                     |
| ILMN_1806754 | GLDC          | 11041.p1,11857.p1                     | 0                                                     |

|              |           |                            |                            |
|--------------|-----------|----------------------------|----------------------------|
| ILMN_1702177 | GLO1      | 12523.p1,11192.p1          | 0                          |
| ILMN_1656145 | GOT1      | 12297.p1,11475.p1          | 0                          |
| ILMN_1662846 | GPR160    | 11041.p1,11879.p1          | 0                          |
| ILMN_1711289 | GYS1      | 12219.p1,11495.p1          | 12044.s1,12224.p1          |
| ILMN_1678037 | HIRIP3    | 12451.p1,11540.p1          | 11177.p1                   |
| ILMN_2157441 | HLA-DRA   | 11532.p1,11495.p1          | 0                          |
| ILMN_1678290 | HMG20A    | 12032.p1,11466.p1          | 0                          |
| ILMN_2409220 | HMMR      | 12297.p1,11274.p1          | 0                          |
| ILMN_1697342 | HOXC11    | 11572.p1,11208.p1          | 11610.p1,11461.p1          |
| ILMN_1799387 | INOC1     | 11501.p1,11572.p1          | 0                          |
| ILMN_2392080 | IQWD1     | 11348.p1,11337.p1          | 12096.p1                   |
| ILMN_1745826 | KATNAL2   | 11457.p1,11442.p1          | 0                          |
| ILMN_2153280 | KIAA0090  | 11041.p1,12261.p1          | 11177.p1                   |
| ILMN_1668469 | KIAA0922  | 11177.p1,11073.p1          | 0                          |
| ILMN_1679232 | KIDINS220 | 12048.p1,11412.p1          | 11029.s1                   |
| ILMN_1741204 | KLHDC2    | 12399.p1,11301.p1,11285.p1 | 0                          |
| ILMN_1804451 | LEO1      | 12523.p1,11469.p1          | 0                          |
| ILMN_1805796 | LOC114984 | 11180.p1,11461.p1          | 11129.p1,12014.p1,11300.s1 |
| ILMN_1727553 | LOC63920  | 11625.p1,11519.p1,11947.p1 | 0                          |
| ILMN_2070355 | LOC644096 | 12297.p1,11475.p1          | 0                          |
| ILMN_1679685 | LOC650040 | 11102.p1,11335.p1          | 0                          |
| ILMN_2053546 | LOC653314 | 11333.p1,11075.p1          | 0                          |
| ILMN_2131756 | LRRC40    | 11459.p1,11348.p1          | 0                          |
| ILMN_1807825 | LY86      | 11219.p1,11469.p1          | 0                          |
| ILMN_1775522 | MAGED1    | 11511.p1,11425.p1          | 0                          |
| ILMN_2205032 | MAGEE1    | 11041.p1,11303.p1          | 0                          |
| ILMN_1709114 | MAP3K7IP1 | 12235.p1,11177.p1          | 11537.p1                   |
| ILMN_1723625 | MAP4K2    | 11276.p1,11442.p1          | 11824.s1                   |
| ILMN_1753639 | MTAP      | 11041.p1,11276.p1          | 11063.s1                   |
| ILMN_1714438 | MUTYH     | 11540.p1,11178.p1          | 0                          |
| ILMN_2087702 | MYH9      | 11469.p1,11046.p1          | 11059.p1                   |
| ILMN_1777528 | NCBP1     | 11466.p1,11178.p1          | 0                          |
| ILMN_2370091 | NGFRAP1   | 11177.p1,11442.p1          | 0                          |
| ILMN_1724194 | NPEPL1    | 11267.p1,11177.p1          | 12299.s1                   |
| ILMN_2336982 | NPTN      | 11114.p1,11233.p1          | 12297.p1,11154.p1,11443.s1 |
| ILMN_1728224 | OGFR      | 12096.p1,11267.p1          | 0                          |
| ILMN_1732024 | OR2A5     | 12224.p1,11461.p1          | 0                          |
| ILMN_1810100 | PBX3      | 11475.p1,11007.p1          | 0                          |
| ILMN_1728684 | PELP1     | 11433.p1,11387.p1          | 0                          |
| ILMN_2075051 | PGS1      | 11177.p1,11014.p1          | 0                          |
| ILMN_1653220 | PITPNM1   | 11177.p1,11379.p1          | 0                          |
| ILMN_2093343 | PLAC8     | 12603.p1,11442.p1          | 0                          |
| ILMN_2361427 | PMS2L3    | 11041.p1,11177.p1          | 12420.p1                   |
| ILMN_1659058 | PPP1R10   | 11625.p1,11947.p1          | 0                          |
| ILMN_1739622 | PPP1R12A  | 11059.p1,11348.p1          | 0                          |
| ILMN_1784822 | PPP1R3F   | 12014.p1,11427.p1,11947.p1 | 11634.p1                   |
| ILMN_1728305 | PUM2      | 11080.p1,11625.p1          | 0                          |
| ILMN_1664030 | RAB1B     | 11046.p1,11180.p1          | 0                          |
| ILMN_1741957 | RABEPK    | 11696.p1,11736.p1          | 11177.p1                   |
| ILMN_2221006 | RAD21     | 12279.p1,11625.p1          | 0                          |
| ILMN_1755023 | RAD50     | 12984.p1,13128.p1          | 11410.s1                   |
| ILMN_1801262 | RAD51L1   | 12399.p1,11329.p1          | 11041.p1                   |
| ILMN_1662198 | RANGAP1   | 12297.p1,11519.p1          | 0                          |
| ILMN_1751886 | REC8L1    | 11333.p1,11424.p1,11458.p1 | 0                          |
| ILMN_1732336 | RFC2      | 11178.p1,11461.p1          | 11537.s1                   |
| ILMN_1784584 | RINT-1    | 11177.p1,11338.p1          | 0                          |
| ILMN_2339748 | RNF13     | 12032.p1,11007.p1          | 11519.s1,11625.p1,11519.p1 |
| ILMN_1655165 | RNF138    | 11868.p1,11073.p1,11348.p1 | 0                          |
| ILMN_2160388 | RPL24     | 12014.p1,12523.p1          | 0                          |

|              |          |                            |                            |
|--------------|----------|----------------------------|----------------------------|
| ILMN_1707810 | RPS5     | 12014.p1,12523.p1          | 0                          |
| ILMN_1806294 | RPS6KA3  | 12014.p1,11192.p1          | 0                          |
| ILMN_1720889 | SC4MOL   | 11333.p1,12184.p1          | 0                          |
| ILMN_2312498 | SEMG1    | 11461.p1,11275.p1          | 0                          |
| ILMN_1788778 | 11-Sep   | 12297.p1,11337.p1          | 0                          |
| ILMN_1682404 | SETMAR   | 13128.p1,11046.p1          | 11177.p1                   |
| ILMN_2059452 | SLC12A2  | 11348.p1,11443.p1          | 11839.p1                   |
| ILMN_1749521 | SLC35E3  | 11723.p1,11947.p1          | 0                          |
| ILMN_2124471 | SLC36A1  | 11178.p1,11271.p1          | 0                          |
| ILMN_1791702 | SMARCA2  | 11285.p1,11443.p1          | 11333.s1                   |
| ILMN_1732053 | SNRP70   | 11466.p1,11178.p1          | 11197.s1,11265.s1          |
| ILMN_1709772 | SNX5     | 12523.p1,11519.p1          | 0                          |
| ILMN_1690920 | SP100    | 11178.p1,11329.p1          | 11947.s1,11177.p1          |
| ILMN_1756501 | ST6GAL1  | 11387.p1,11879.p1          | 11519.s1,11519.p1          |
| ILMN_1651692 | STK10    | 11090.p1,11379.p1          | 0                          |
| ILMN_1655163 | STK24    | 11301.p1,11219.p1          | 12343.p1,11254.s1,11466.s1 |
| ILMN_1693726 | TBC1D10A | 11083.p1,11180.p1          | 0                          |
| ILMN_1743352 | TBCC     | 12032.p1,11947.p1          | 0                          |
| ILMN_1656798 | TIMM17A  | 11335.p1,11348.p1          | 0                          |
| ILMN_1711566 | TIMP1    | 11387.p1,11177.p1,11442.p1 | 11443.s1                   |
| ILMN_2192316 | TOP1     | 12297.p1,11947.p1          | 0                          |
| ILMN_1796063 | TRIM44   | 12603.p1,11301.p1          | 0                          |
| ILMN_1806778 | UBE2E1   | 11219.p1,11348.p1          | 11947.s1                   |
| ILMN_2395932 | UNC45A   | 12512.p1,11177.p1          | 11466.s1                   |
| ILMN_1697906 | WBP4     | 11625.p1,11947.p1          | 11333.s1                   |
| ILMN_2104106 | XPR1     | 11519.p1,11947.p1          | 0                          |
| ILMN_1665205 | ZFP260   | 11625.p1,11947.p1          | 11857.p1                   |
| ILMN_2358382 | ZFYVE1   | 11502.p1,11406.p1,11180.p1 | 0                          |
| ILMN_1719202 | ZNF174   | 11071.p1,11466.p1          | 0                          |
| ILMN_2117904 | ZNF22    | 11276.p1,11301.p1          | 11461.s1                   |
| ILMN_1701875 | ZYX      | 11610.p1,11177.p1          | 11578.s1                   |

**Table S5. CNVs with Expression Dysregulation**

Submitted as a separate Excel file.

**Table S6. Primer Information****Primers for Validating Expression Change**

| <b>Gene</b>     | <b>Sequence</b>            | <b>Note</b> |
|-----------------|----------------------------|-------------|
| <i>GAPDH_L</i>  | TCATCAGCAATGCCTCCTGCAC     | Forward     |
| <i>GAPDH_R</i>  | GGTGGCAGTGATGGCATGGAC      | Reverse     |
| <i>ITPR1_L</i>  | AGCTCCCAGGTGTCCTAAAG       | Forward     |
| <i>ITPR1_R</i>  | GCAGCAGCATCATTGAAAG        | Reverse     |
| <i>SUMF1_L</i>  | AGGAACGAGGACCTTGAATG       | Forward     |
| <i>SUMF1_R</i>  | CATGATTCAAAGCATCGGATA      | Reverse     |
| <i>AXIN1_L</i>  | CACGTGTGCTGGGATCTACT       | Forward     |
| <i>AXIN1_R</i>  | CAAGCTGTGTTGAAGGCACT       | Reverse     |
| <i>RAB40C_L</i> | GACTTTGAGGACCTGGATGG       | Forward     |
| <i>RAB40C_R</i> | AAAGAACGGTTCGGAGAGAA       | Reverse     |
| <i>MRPS35_L</i> | TCATCAGAAAGAAATATCCTGGAA   | Forward     |
| <i>MRPS35_R</i> | GGATTCTTTGTACTGAGAAATGGA   | Reverse     |
| <i>SFRS10_L</i> | AAACCGGGTGCTTCAAAGT        | Forward     |
| <i>SFRS10_R</i> | TGGTAAGCAAAGGACCTGAA       | Reverse     |
| <i>GOT1_L</i>   | CTGAAGGAGCCAAAGTGTGA       | Forward     |
| <i>GOT1_R</i>   | GGACACAACCATGCAGAAAG       | Reverse     |
| <i>CHD1L_L</i>  | GCAAGATTTGTTGGCCTTG        | Forward     |
| <i>CHD1L_R</i>  | CTCTTCTAGGGCTGCCATCT       | Reverse     |
| <i>PRKAB2_L</i> | ATTTCTTGTGACCCAGCCTT       | Forward     |
| <i>PRKAB2_R</i> | CGCTAAGGACCATCACACTG       | Reverse     |
| <i>PEF1_L</i>   | GATGCCAGTGGTGAGTGTTC       | Forward     |
| <i>PEF1_R</i>   | AAGCCACTGGTCCCATAGAC       | Reverse     |
| <i>ELF1_L</i>   | TGCAGAGAAATAAGTGACCCA      | Forward     |
| <i>ELF1_R</i>   | CTTAGCAACACAAGTTTACTAATGGA | Reverse     |
| <i>CSTF2T_L</i> | CTGGCTTTCTTATACAGATGGTGT   | Forward     |
| <i>CSTF2T_R</i> | CTGGGCCTTGATTATTCCTG       | Reverse     |
| <i>CTNND1_L</i> | TTTGGACGTGACCAGGATAA       | Forward     |
| <i>CTNND1_R</i> | CCACAGGGTTCCGGTAATAA       | Reverse     |
| <i>ADARB1_L</i> | CGAGTACCAAGCCACAAGAA       | Forward     |
| <i>ADARB1_R</i> | CTGACTCCATTAGCGTTCCA       | Reverse     |
| <i>ALODA_L</i>  | TATGTGACCGAGAAGGTGCT       | Forward     |
| <i>ALODA_R</i>  | GCCTTCCAGGTAGATGTGGT       | Reverse     |
| <i>MAPK3_L</i>  | CAGTTCTGGAATGGAAGGGT       | Forward     |

|                  |                       |         |
|------------------|-----------------------|---------|
| <i>MAPK3_R</i>   | TTCCTTCAGGGAAACTAGGG  | Reverse |
| <i>CORO1A_L</i>  | CCATGTTTCAGTTCCAAGGAG | Forward |
| <i>CORO1A_R</i>  | AGCTTGTAGAACCTGGCGAT  | Reverse |
| <i>TMLHE_L</i>   | GCTCAGCATCGTGCTACAAC  | Forward |
| <i>TMLHE_R</i>   | ACCATCTGGCCAAGTGAAA   | Reverse |
| <i>COX6A1_L</i>  | CTCGCATGTGGAAGACTCTC  | Forward |
| <i>COX6A1_R</i>  | AACGGCTTGGTCCTGATG    | Reverse |
| <i>TRIAP1_L</i>  | TTGCAGTGAACACCATTTC   | Forward |
| <i>TRIAP1_R</i>  | GTTGAGAGCTGGCAATAGCA  | Reverse |
| <i>SEC23B_L1</i> | CAGTCAGGCTCGATTCTTT   | Forward |
| <i>SEC23B_R1</i> | GTTAGGATGGGTGCTCCAGT  | Reverse |
| <i>TIMP1_L1</i>  | TACTTCCACAGGTCCCACAA  | Forward |
| <i>TIMP1_R1</i>  | GGAAACACTGTGCATTCTC   | Reverse |

#### Primers for Validating Copy-Number Change

| Gene              | Sequence                | Note    |
|-------------------|-------------------------|---------|
| <i>12q24.31_F</i> | GTGCCTTAGTGCAAGTTCTTCAT | Forward |
| <i>12q24.31_R</i> | GAATTGAGACGTAATCCCAAGTG | Reverse |
| <i>20p11.23_F</i> | TTTAGGTTTGATGTGTGTGCATC | Forward |
| <i>20p11.23_R</i> | TGAAGAAGGCTACAGAGAACAGG | Reverse |
| <i>Xp11.23_F</i>  | GACAGCAATGAAATGCAGGTAG  | Forward |
| <i>Xp11.23_R</i>  | TTCATAAAGGTGAGGGTTCGAGT | Reverse |
| <i>Xq28_F</i>     | TGTTGGAGGTGTTGGAAATAATC | Forward |
| <i>Xq28_R</i>     | AACCTCATCAACAGTTTCCTTGA | Reverse |

#### References

- Voineagu, I., Wang, X., Johnston, P., Lowe, J.K., Tian, Y., Horvath, S., Mill, J., Cantor, R.M., Blencowe, B.J., and Geschwind, D.H. (2010). Transcriptomic analysis of autistic brain reveals convergent molecular pathology. *Nature* 474, 380-384.
- Nishimura, Y., Martin, C.L., Vazquez-Lopez, A., Spence, S.J., Alvarez-Retuerto, A.I., Sigman, M., Steindler, C., Pellegrini, S., Schanen, N.C., Warren, S.T., et al. (2007). Genome-wide expression profiling of lymphoblastoid cell lines distinguishes different forms of autism and reveals shared pathways. *Hum Mol Genet* 16, 1682-1698.
- Ghahramani Seno, M.M., Hu, P., Gwadry, F.G., Pinto, D., Marshall, C.R., Casallo, G., and Scherer, S.W. (2011). Gene and miRNA expression profiles in autism spectrum disorders. *Brain Res* 1380, 85-97.
- Hu, V.W., Nguyen, A., Kim, K.S., Steinberg, M.E., Sarachana, T., Scully, M.A., Soldin, S.J., Luu, T., and Lee, N.H. (2009). Gene expression profiling of lymphoblasts from autistic and nonaffected sib pairs: altered pathways in neuronal development and steroid biosynthesis. *PLoS One* 4, e5775.
